# Supplementary figures and images for: Chromosome-wide mechanisms to decouple gene expression from gene dose during sex-chromosome evolution
Source: eLife journal article supplement (doi:10.7554/elife.17365), 2016-08-30

Figure 1 — figure supplement 1

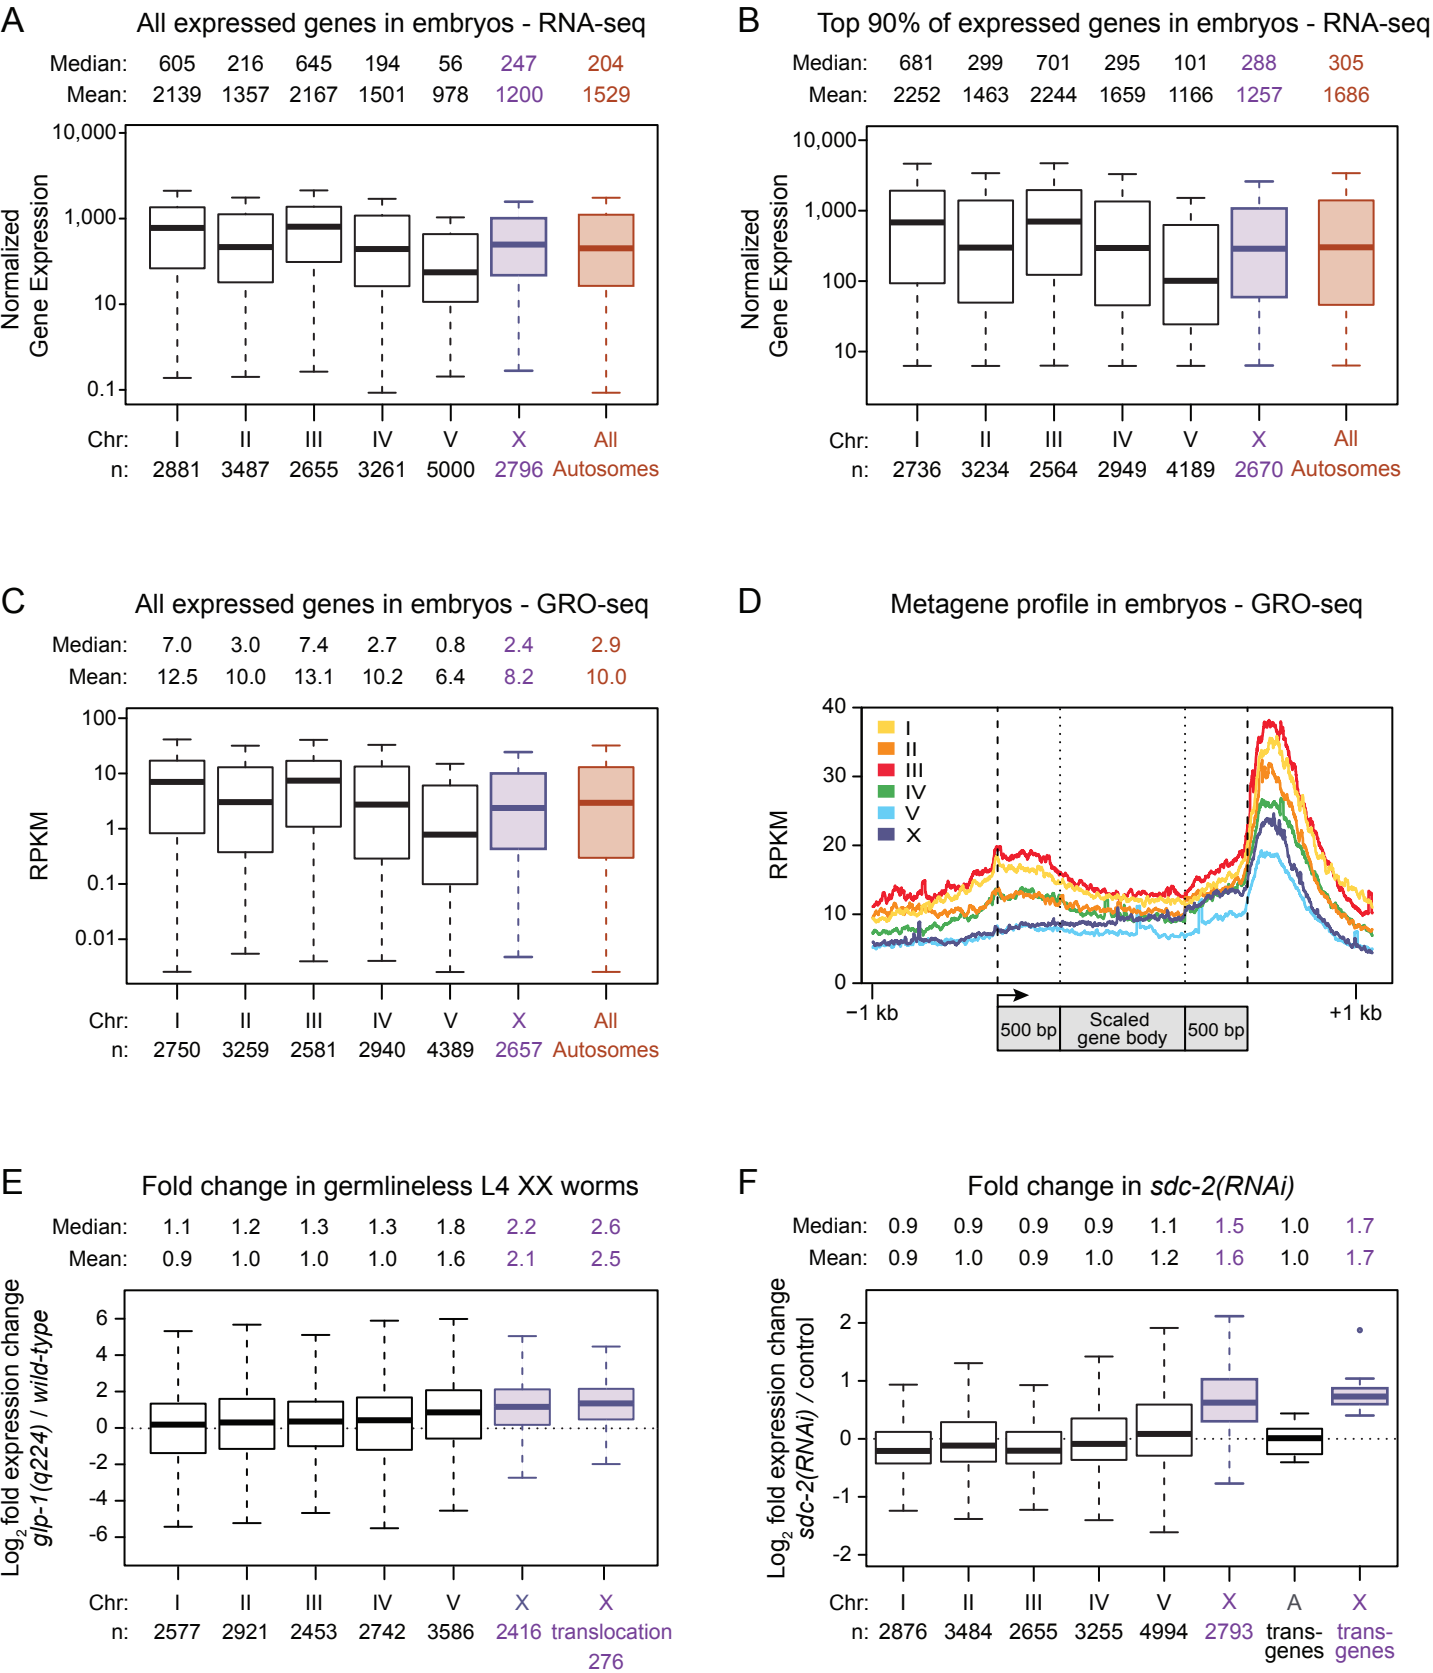

Supplement: supp [file elife_poa_e17365_Figure_1_figure_supplement_1.pdf › elife_poa_e17365_Figure_1_figure_supplement_1.pdf]

Figure 3 — figure supplement 1

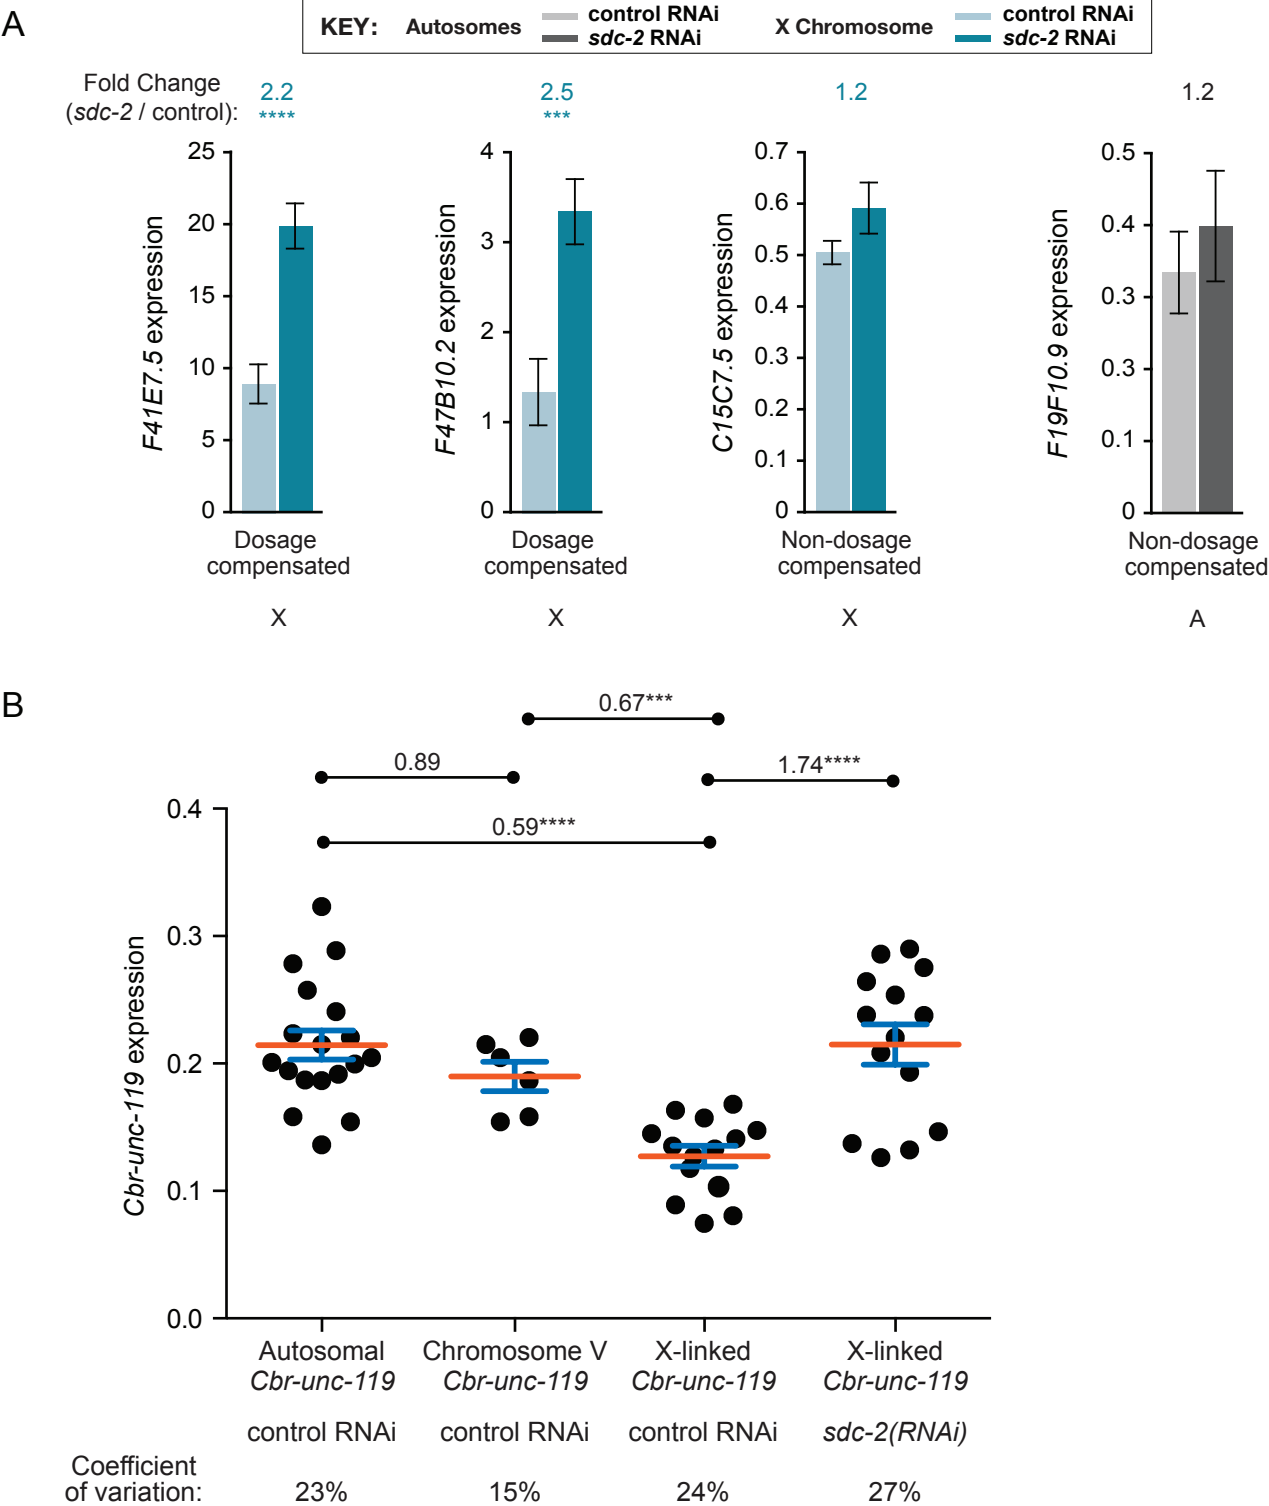

Supplement: supp [file elife_poa_e17365_Figure_3_figure_supplement_1.pdf › elife_poa_e17365_Figure_3_figure_supplement_1.pdf]

Figure 4 — figure supplement 1

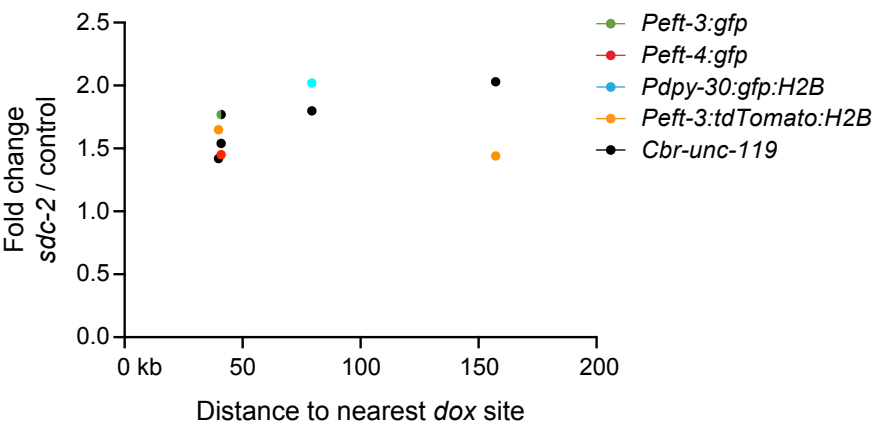

Supplement: supp [file elife_poa_e17365_Figure_4_figure_supplement_1.pdf › elife_poa_e17365_Figure_4_figure_supplement_1.pdf]

Figure 7 — figure supplement 1

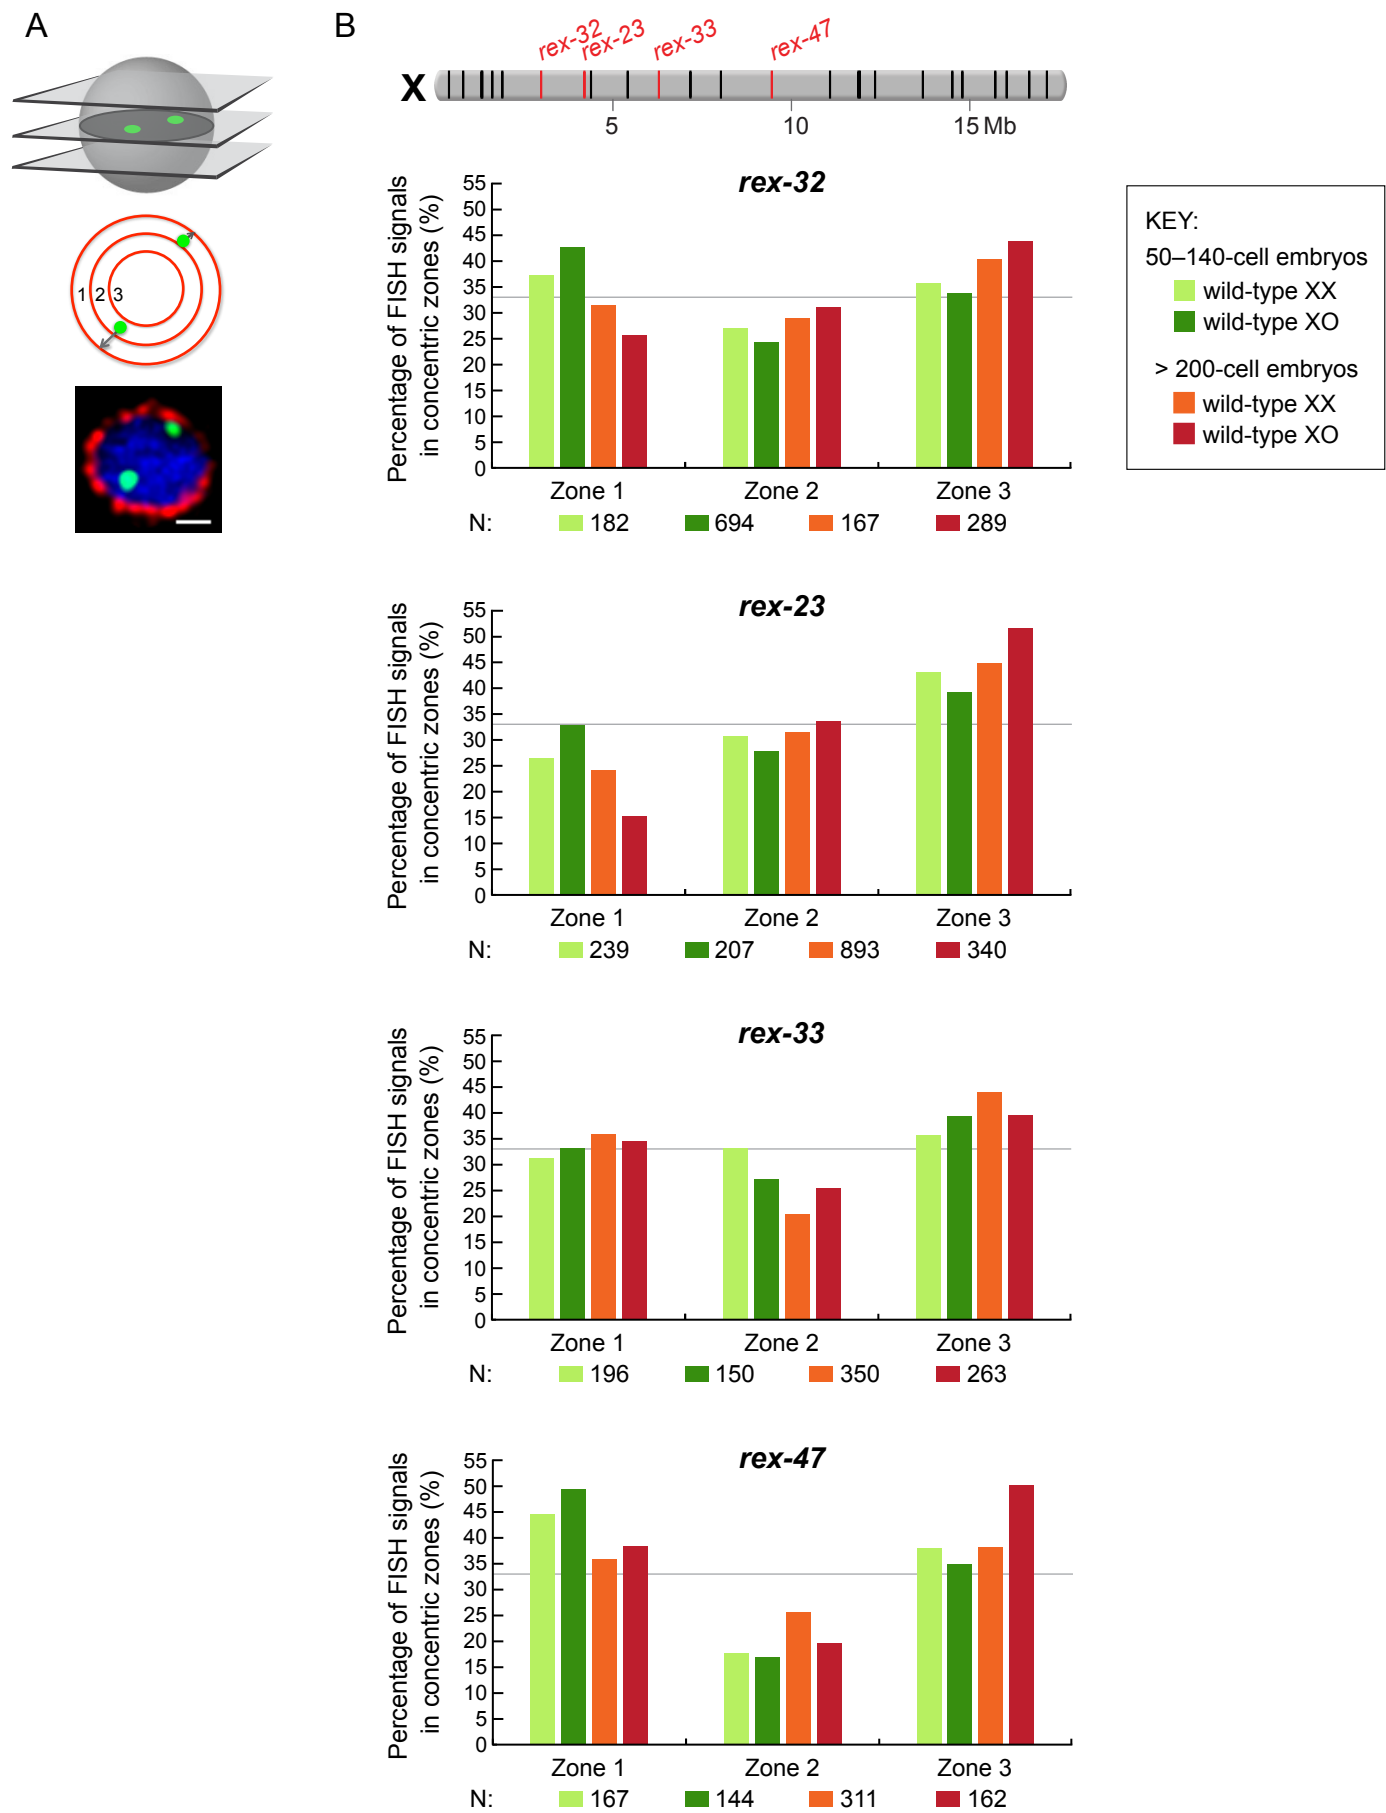

Supplement: supp [file elife_poa_e17365_Figure_7_figure_supplement_1.pdf › elife_poa_e17365_Figure_7_figure_supplement_1.pdf]

Figure 7 — figure supplement 2

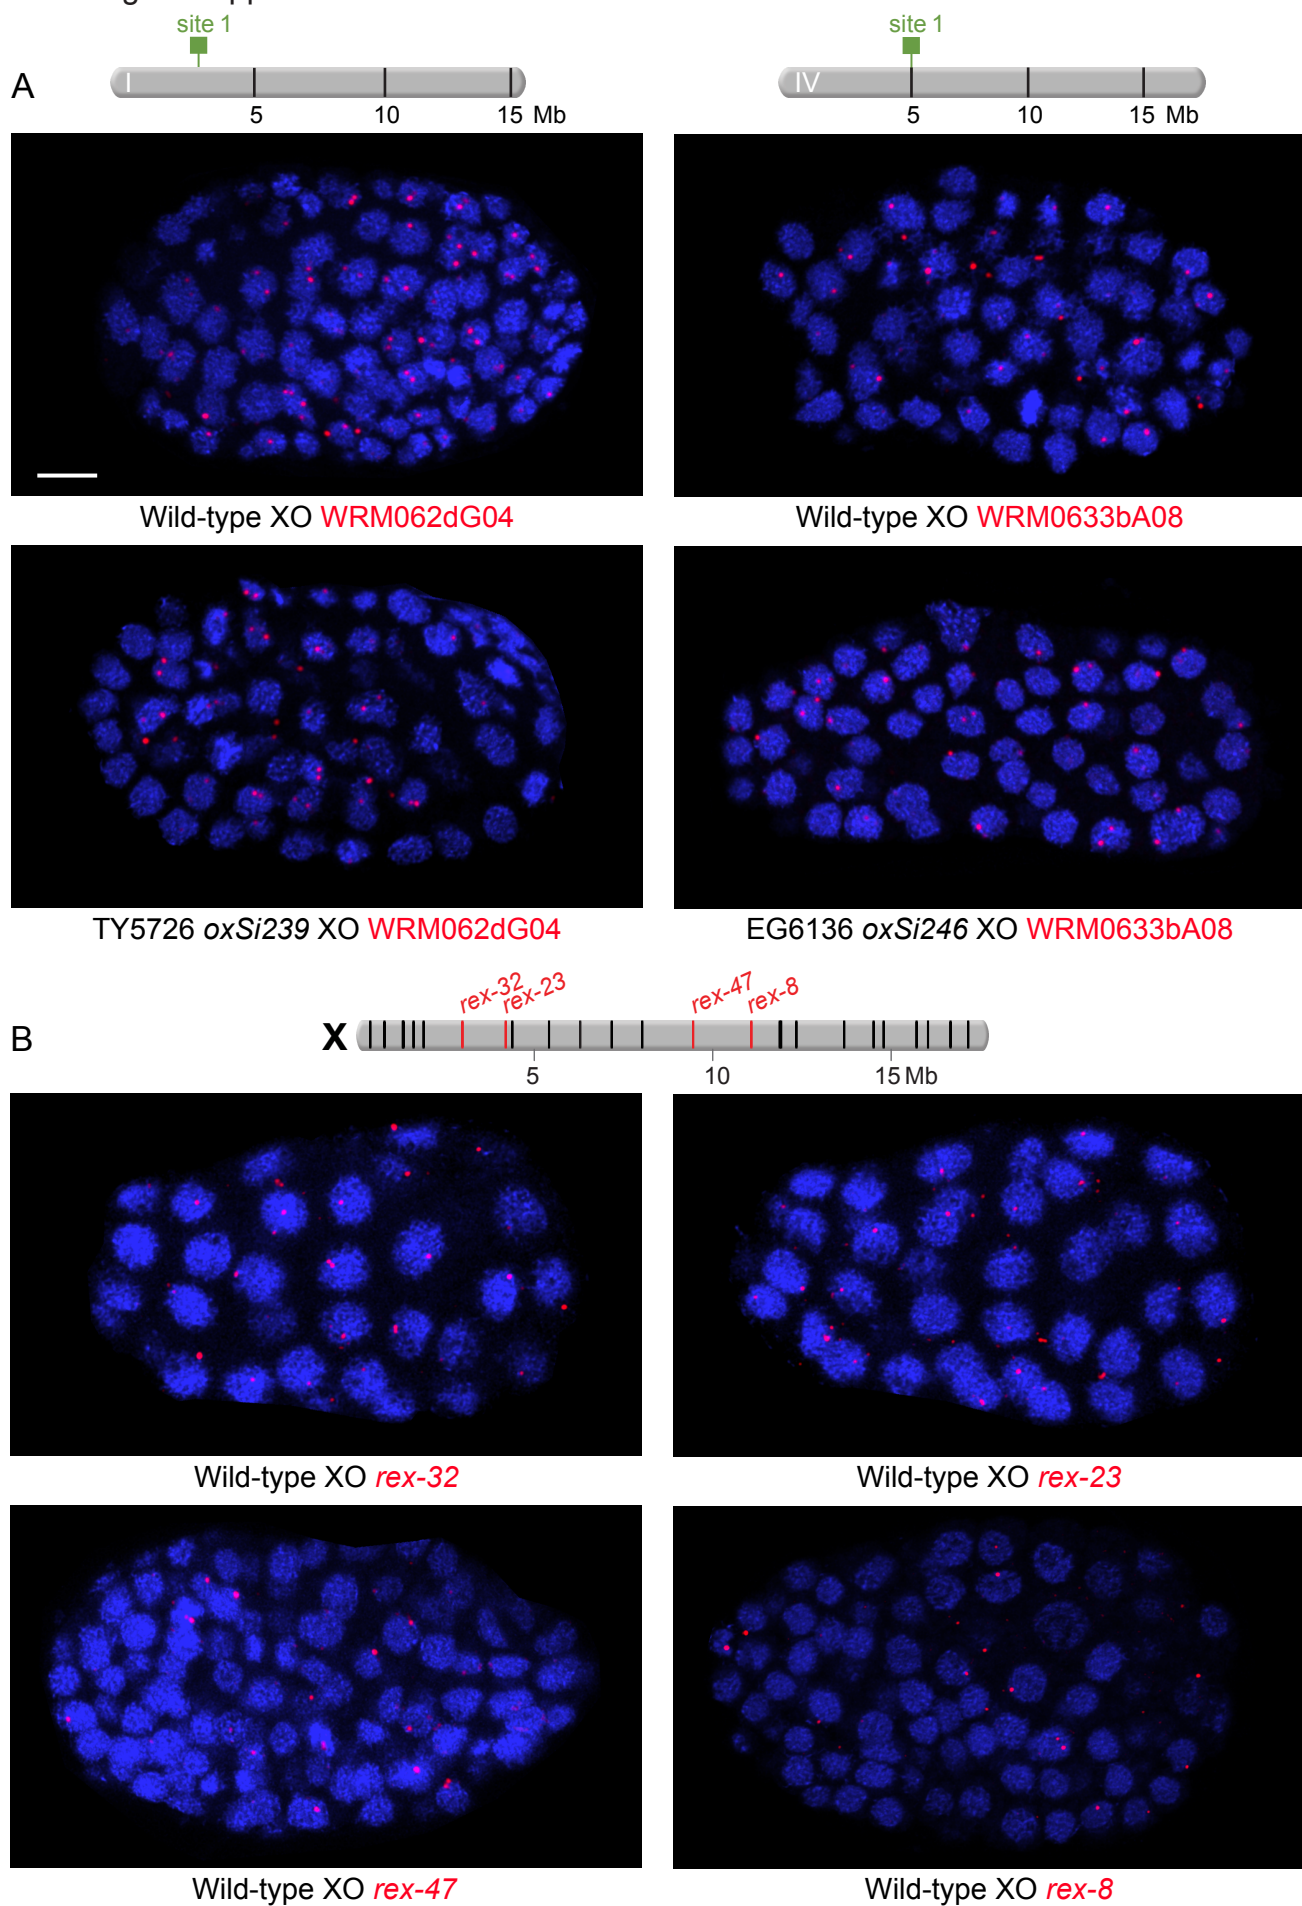

Supplement: supp [file elife_poa_e17365_Figure_7_figure_supplement_2.pdf › elife_poa_e17365_Figure_7_figure_supplement_2.pdf]

Figure 7 — figure supplement 3

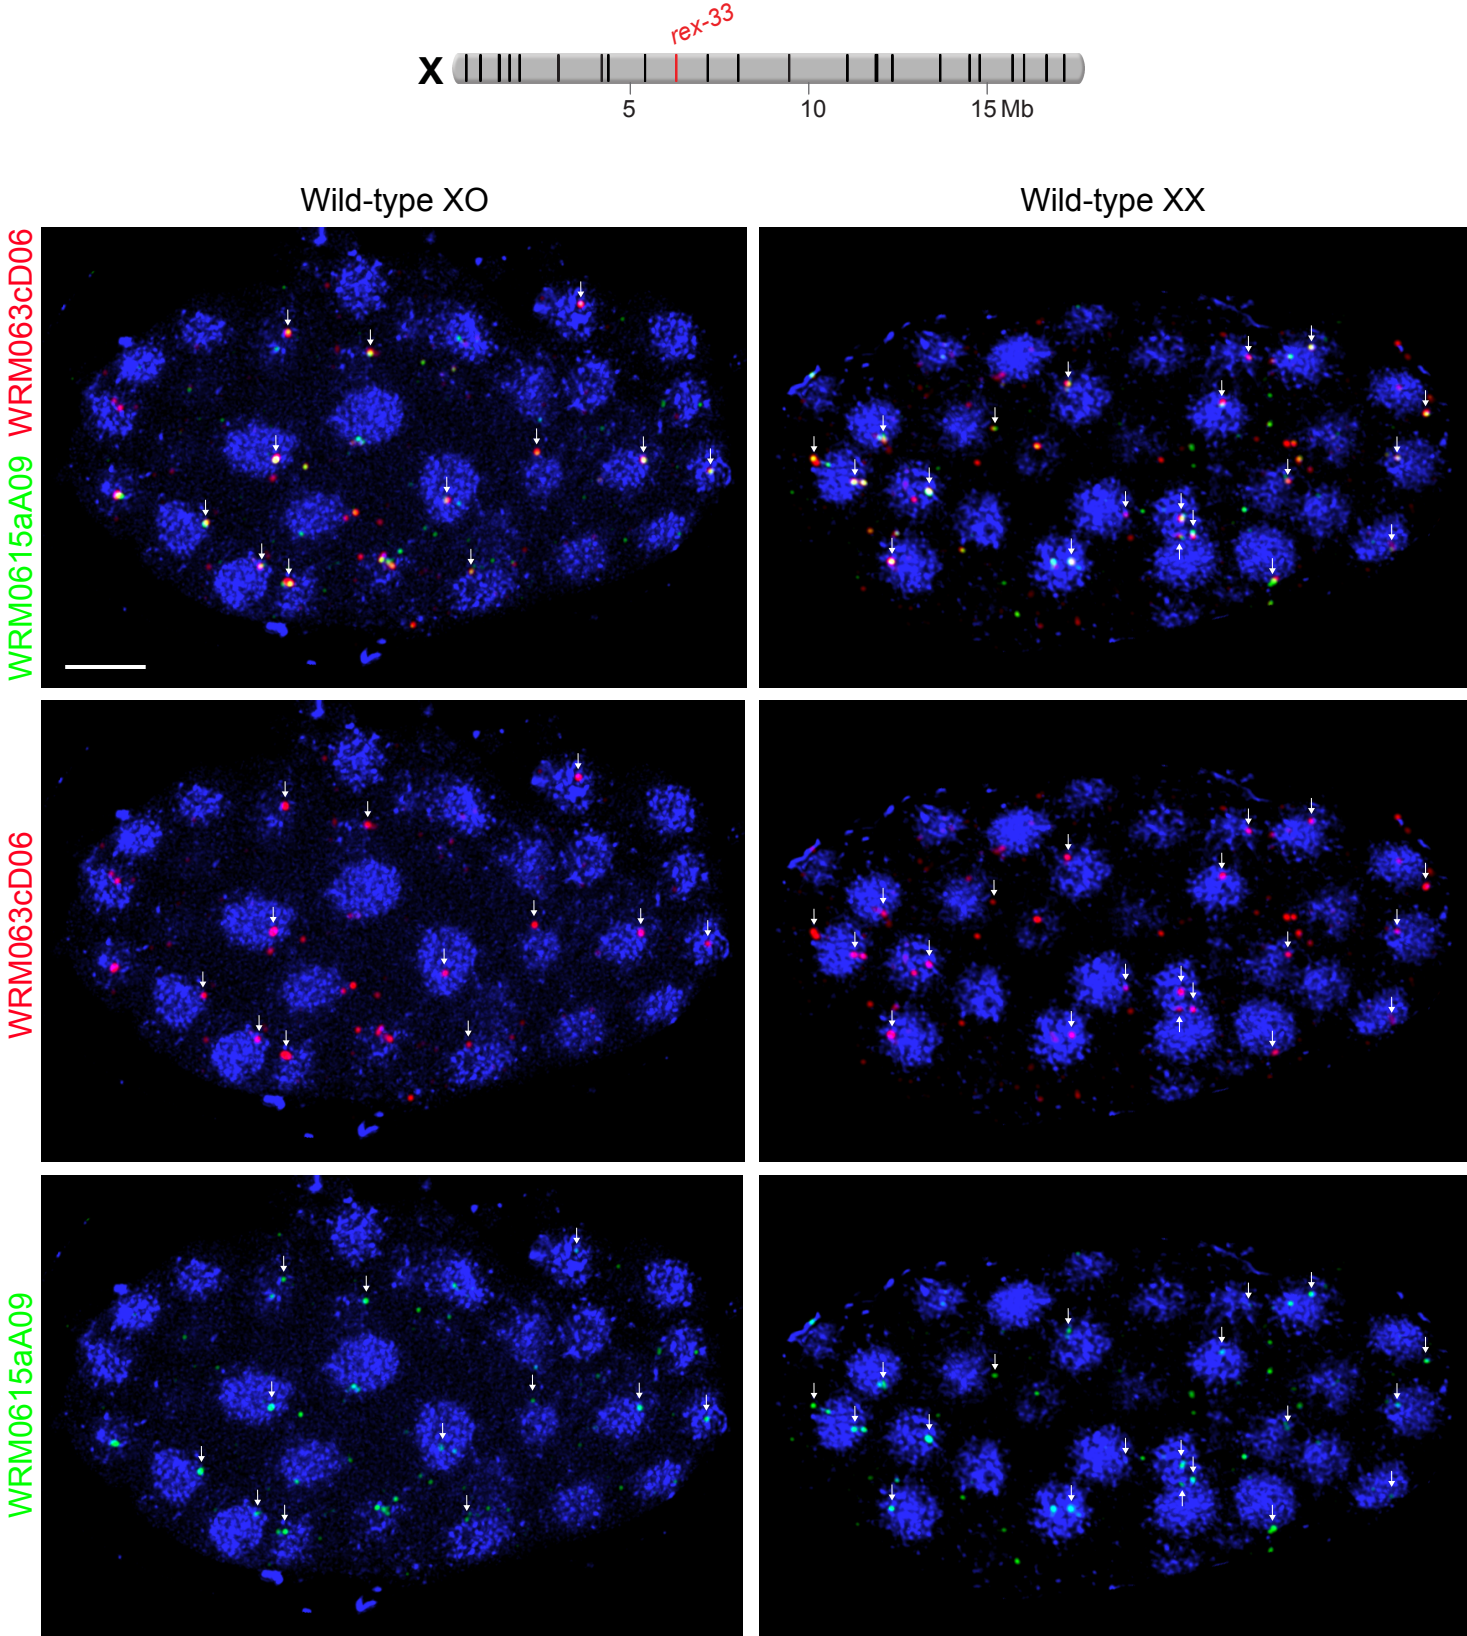

Supplement: supp [file elife_poa_e17365_Figure_7_figure_supplement_3.pdf › elife_poa_e17365_Figure_7_figure_supplement_3.pdf]
